# Supplementary material for: Clinicopathological and Genomic Profiles of Atypical Fibroxanthoma and Pleomorphic Dermal Sarcoma Identify Overlapping Signatures with a High Mutational Burden
Source: MDPI journal article supplement (doi:10.3390/genes12070974), 2021-06-25
Supplement: s1 [file s1]

|                        | <b>AFX</b><br><b>(n= 10)</b> | <b>PDS</b><br><b>(n= 13)</b> | <b>Total</b><br><b>(n= 23)</b> |
|------------------------|------------------------------|------------------------------|--------------------------------|
| <b>AE1</b>             |                              |                              |                                |
| Positive               | 1                            | 0                            | 1                              |
| Negative               | 6                            | 10                           | 16                             |
| Unknown                | 3                            | 3                            | 6                              |
| <b>p63</b>             |                              |                              |                                |
| Positive               | 0                            | 0                            | 0                              |
| Negative               | 5                            | 3                            | 8                              |
| Unknown                | 5                            | 10                           | 15                             |
| <b>Pan-Cytokeratin</b> |                              |                              |                                |
| Positive               | 0                            | 0                            | 0                              |
| Negative               | 1                            | 1                            | 2                              |
| Unknown                | 9                            | 12                           | 21                             |
| <b>CK7</b>             |                              |                              |                                |
| Positive               | 0                            | 0                            | 0                              |
| Negative               | 0                            | 1                            | 1                              |
| Unknown                | 13                           | 12                           | 25                             |
| <b>HMB45</b>           |                              |                              |                                |
| Positive               | 0                            | 0                            | 0                              |
| Negative               | 2                            | 2                            | 2                              |
| Unknown                | 8                            | 11                           | 21                             |
| <b>Melan-A</b>         |                              |                              |                                |
| Positive               | 0                            | 0                            | 0                              |
| Negative               | 6                            | 9                            | 15                             |
| Unknown                | 4                            | 4                            | 8                              |
| <b>s-100</b>           |                              |                              |                                |
| Positive               | 1                            | 0                            | 1                              |
| Negative               | 7                            | 11                           | 18                             |
| Unknown                | 2                            | 2                            | 4                              |
| <b>SOX-10</b>          |                              |                              |                                |
| Positive               | 0                            | 0                            | 0                              |
| Negative               | 1                            | 0                            | 1                              |
| Unknown                | 9                            | 13                           | 22                             |
| <b>Tyrosinase</b>      |                              |                              |                                |
| Positive               | 0                            | 0                            | 0                              |
| Negative               | 0                            | 3                            | 3                              |
| Unknown                | 10                           | 10                           | 20                             |
| <b>ki-67</b>           |                              |                              |                                |
| Positive               | 5                            | 4                            | 9                              |
| Negative               | 0                            | 0                            | 0                              |
| Unknown                | 5                            | 9                            | 14                             |
| <b>CD31</b>            |                              |                              |                                |
| Positive               | 1                            | 1                            | 2                              |

|                   |    |    |    |
|-------------------|----|----|----|
| Negative          | 2  | 2  | 4  |
| Unknown           | 7  | 10 | 17 |
| <b>FXIII-A</b>    |    |    |    |
| Positive          | 1  | 2  | 3  |
| Negative          | 0  | 1  | 1  |
| Unknown           | 9  | 10 | 19 |
| <b>CD117</b>      |    |    |    |
| Positive          | 0  | 0  | 0  |
| Negative          | 0  | 1  | 1  |
| Unknown           | 10 | 12 | 22 |
| <b>CD34</b>       |    |    |    |
| Positive          | 2  | 0  | 2  |
| Negative          | 1  | 6  | 7  |
| Unknown           | 7  | 7  | 14 |
| <b>Actin</b>      |    |    |    |
| Positive          | 0  | 1  | 1  |
| Negative          | 0  | 1  | 1  |
| Unknown           | 10 | 11 | 21 |
| <b>Desmin</b>     |    |    |    |
| Positive          | 0  | 0  | 0  |
| Negative          | 3  | 3  | 6  |
| Unknown           | 7  | 10 | 17 |
| <b>alpha SMA</b>  |    |    |    |
| Positive          | 0  | 0  | 0  |
| Negative          | 1  | 4  | 5  |
| Unknown           | 9  | 9  | 18 |
| <b>Podoplanin</b> |    |    |    |
| Positive          | 0  | 0  | 0  |
| Negative          | 0  | 2  | 2  |
| Unknown           | 10 | 11 | 21 |
| <b>Lysozme</b>    |    |    |    |
| Positive          | 0  | 0  | 0  |
| Negative          | 0  | 1  | 1  |
| Unknown           | 10 | 12 | 22 |
| <b>CD30</b>       |    |    |    |
| Positive          | 0  | 0  | 0  |
| Negative          | 0  | 1  | 1  |
| Unknown           | 10 | 12 | 22 |
| <b>CD68</b>       |    |    |    |
| Positive          | 1  | 7  | 8  |
| Negative          | 2  | 1  | 3  |
| Unknown           | 7  | 5  | 12 |
| <b>CD20</b>       |    |    |    |
| Positive          | 0  | 0  | 0  |

|                 |    |    |    |
|-----------------|----|----|----|
| Negative        | 0  | 1  | 1  |
| Unknown         | 10 | 12 | 22 |
| <b>CD10</b>     |    |    |    |
| Positive        | 2  | 0  | 2  |
| Negative        | 0  | 0  | 0  |
| Unknown         | 8  | 13 | 21 |
| <b>Vimentin</b> |    |    |    |
| Positive        | 4  | 4  | 8  |
| Negative        | 1  | 0  | 1  |
| Unknown         | 5  | 9  | 14 |
| <b>MITF</b>     |    |    |    |
| Positive        | 0  | 0  | 0  |
| Negative        | 1  | 1  | 2  |
| Unknown         | 9  | 12 | 21 |
| <b>CEA</b>      |    |    |    |
| Positive        | 0  | 0  | 0  |
| Negative        | 0  | 1  | 1  |
| Unknown         | 10 | 12 | 22 |
| <b>EMA</b>      |    |    |    |
| Positive        | 0  | 0  | 0  |
| Negative        | 0  | 3  | 3  |
| Unknown         | 10 | 10 | 20 |
| <b>GLUT-1</b>   |    |    |    |
| Positive        | 0  | 0  | 0  |
| Negative        | 0  | 1  | 1  |
| Unknown         | 10 | 12 | 22 |

**Supplemental Table S1.** Immunohistochemical features of AFX and PDS tumor samples
